# Supplementary material
Source: PubMed Central journal article supplement (PMC2663987)
Supplement: 0901377106_0901377106SI.pdf [file 0901377106_0901377106SI.pdf]

# Supporting Information

Blackledge et al. 10.1073/pnas.0901377106

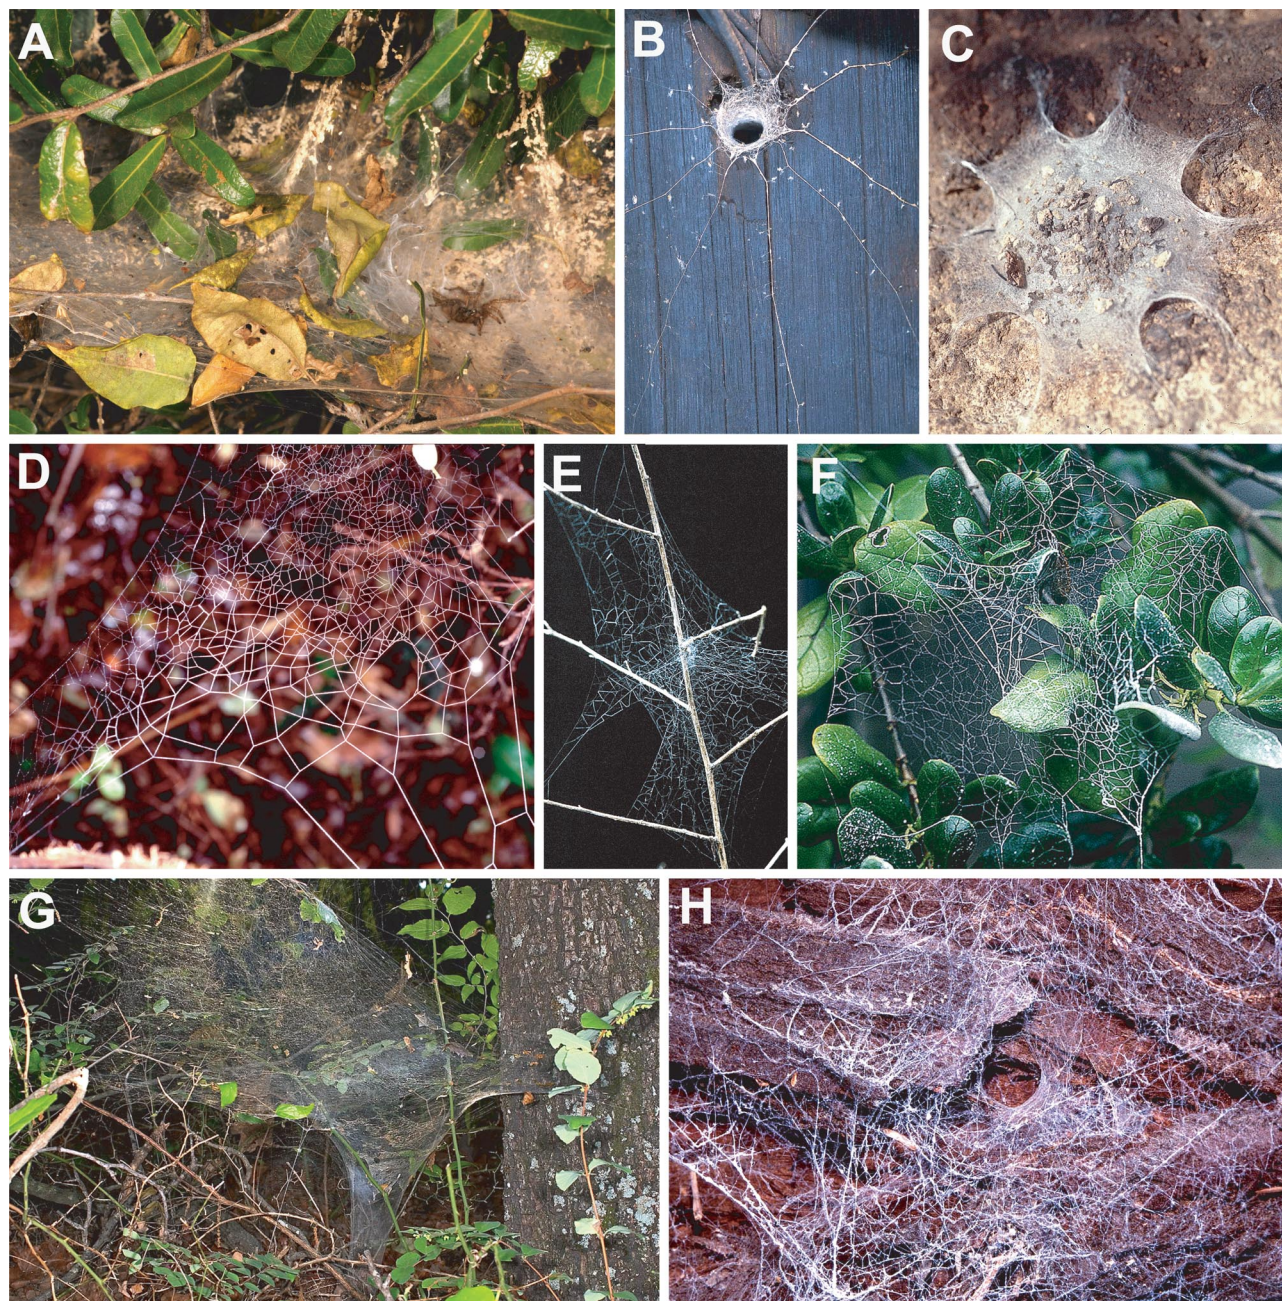

Fig. S1. Webs of nonorbicularian spiders. (A) Dipluridae. (B) *Ariadna*. (C) *Oecobius*. (D) *Austrochilus*. (E) *Dictyna*. (F) *Badumna*. (G) *Agelenopsis*. (H) *Callobius*.



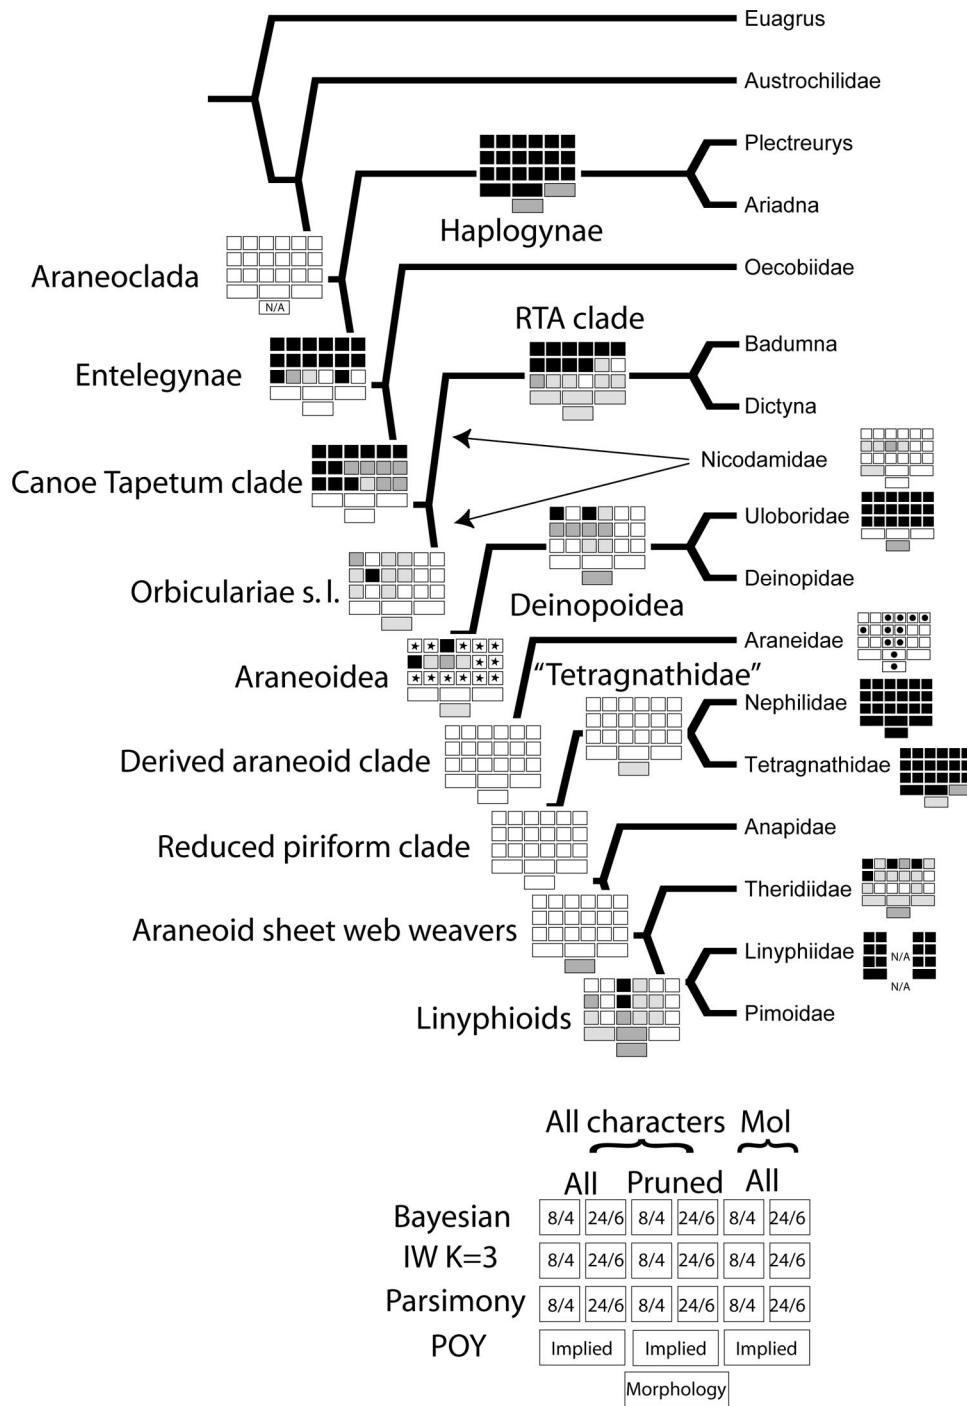

**Fig. S3.** Classical phylogenetic hypothesis from Kullmann EJ [(1972) *Am Zool* 12:395–405]. Boxes indicate support from current analyses. Black indicates strong support (i.e., posterior probabilities >90% or jackknife >75%), and gray indicates moderate support (i.e., posterior probabilities <90% but >75% or jackknife <75% but >50%).







**Table S2. Loci amplified for the analysis.**

| Locus    | Forward                          | Reverse                          | Internal sequencing primers            | bp     | Annealing temp. |
|----------|----------------------------------|----------------------------------|----------------------------------------|--------|-----------------|
| COI      | LCO(13)                          | C1-N-2776(14)                    | HCO (13) C1-J-2183 (15) C1-N-2191 (15) | 1261   | 44–48           |
| 16S      | LR-N-13398 (15)                  | 16Sb (16)                        | —                                      | ≈450   | 44–48           |
| H3       | H3f (17)                         | H3r (17)                         | —                                      | 328    | 46–50           |
| Wingless | Spwgf1<br>gyaaatgccayggwatgtcmgg | Spwgr1<br>acttgrcaacaccartgaaawg | —                                      | 352    | 50–54           |
| 18S      | 18Sai0.7 (18)                    | 9r (19)                          | 5f (19) 18Sbi (20)                     | ≈1,200 | 48–52           |
| 28S      | 28SB (21)                        | 28SO (14)                        | -                                      | ≈780   | 48–52           |

## Other Supporting Information Files

[Dataset S1](#)

[SI Appendix](#)
